# Supplementary material for: HSPA12A promotes c-Myc lactylation-mediated proliferation of tubular epithelial cells to facilitate renal functional recovery from kidney ischemia/reperfusion injury
Source: PubMed Central journal article supplement — Cell Mol Life Sci. 2024 Sep 15;81(1):404. doi: 10.1007/s00018-024-05427-5 (PMC11402889; doi:10.1007/s00018-024-05427-5), 2024-09-15
Supplement: 18_2024_5427_MOESM1_ESM.pdf [file 18_2024_5427_MOESM1_ESM.pdf]

## Supplemental Figure Legends

### **Fig. S1 Bioinformatic analysis of *Hsp* mRNA from the publicly available data for mouse KI/R (GSE172042).**

- A. Heatmap of 29 *Hsps* mRNA levels in kidneys of sham and KI/R mice.
- B. mRNA levels of 29 *Hsps* in sham kidneys. Note that *Hspa12a* mRNA showed the highest level among these 29 *Hsps* in normal kidneys.
- C. Effects of KI/R on mRNA levels of 29 *Hsps* in kidneys. Data are mean  $\pm$  SD, \* $P < 0.05$  and \*\* $P < 0.01$  by Student's two-tailed unpaired *t*- test or Mann–Whitney U test.  $n = 2-3$ .

### **Fig. S2 Effects of KI/R on expression of HSPs.**

Expression of HSP32, HSP47, HSP60 and HSP70 were examined by immunoblotting in mouse kidneys following KI/R. Blots for GAPDH served as loading controls. Data are mean  $\pm$  SD, \*\* $P < 0.01$  by Student's two-tailed unpaired *t*- test.  $n = 3$ .

### **Fig. S3 Identification of the isolated primary TEC.**

The primary TEC that isolated from mouse kidneys were immunostained with the epithelial marker CK-18 (red). DAPI was used to counter stain nuclei. Scale bar = 50  $\mu\text{m}$ .

**Fig. S4 Time-effect on HSPA12A expression in primary TEC after reperfusion.**

The time-effect on HSPA12A expression in primary TEC at 0 h, 3 h, 6 h and 12 h after reperfusion were examined by immunoblotting. Blots for GAPDH served as loading controls. Data are mean  $\pm$  SD,  $**P < 0.01$  by one-way ANOVA followed by Tukey's test.  $n = 4$ .

**Fig. S5 HSPA12A increases nuclear abundance of c-Myc in TEC after H/R.**

Nuclear fractions were prepared from H/R-treated TEC. c-Myc protein expression was examined by immunoblotting. Blots for H3 served as loading controls. Data are mean  $\pm$  SD,  $*P < 0.05$  by Student's two-tailed unpaired  $t$ - test.  $n = 4$ .

**Fig. S6 Effects of HSPA12A on c-Myc mRNA and protein levels in primary TEC upon H/R.**

The following experiments were performed in primary TEC after H/R.

**A.** The mRNA levels of c-Myc were analyzed by RT-PCR.  $*P < 0.05$  and  $*P < 0.05$  by two-way ANOVA followed by Tukey's test.  $n = 4$ .

**B.** The protein levels of c-Myc were examined by immunoblotting. Blots for GAPDH served as loading controls. Data are mean  $\pm$  SD,  $*P < 0.05$  and  $**P < 0.01$  by two-way ANOVA followed by Tukey's test.  $n = 4$ .

**C.** Immunostaining for c-Myc and ubiquitin was performed. DAPI staining was used to indicate nuclei. Data are mean  $\pm$  SD,  $**P < 0.01$  by Student's two-tailed unpaired  $t$ - test.  $n = 3$ .

**Fig. S7 Knockdown of c-Myc in TEC after H/R.**

c-Myc knockdown in TEC was confirmed by immunoblotting.  $**P < 0.01$  by Mann–Whitney U test.  $n = 5$ /group.

**Fig. S8 C646 reverses the HSPA12A-increased c-Myc nuclear abundance in TEC.**

Nuclear fractions were prepared from H/R-treated TEC in the presence or absence of C646. c-Myc protein in nuclear fraction was examined by immunoblotting. Blots for H3 served as loading controls. Data are mean  $\pm$  SD,  $**P < 0.01$  by one-way ANOVA followed by Tukey's test.  $n = 4$ .

**Fig. S9 Effects of HSPA12A on expression of glycolysis-related genes in primary TEC.**

- A.** ATP production rate was analyzed by the seahorse assay in primary TEC following H/R. Data are mean  $\pm$  SD,  $*P < 0.05$  by Student's two-tailed unpaired *t*-test  $n = 4$ .
- B.** Expression of the indicated genes were examined by immunoblotting in primary TEC following H/R. Blots for GAPDH served as loading controls. Data are mean  $\pm$  SD,  $**P < 0.01$  by two-way ANOVA followed by Tukey's test.  $n = 3$ .

**Fig. S10 Effects of HSPA12A on expression of glycolysis-related genes in mouse kidneys following KI/R.**

- A.** Lactate contents were analyzed in serum of mice following KI/R. Data are mean  $\pm$  SD,  $**P < 0.01$  by Mann–Whitney U test.  $n = 5$ .

**B.** Protein expressions of glycolysis-related genes were determined by immunoblotting in KI/R kidneys of mice. Data are mean  $\pm$  SD,  $**P < 0.01$  by Student's two-tailed unpaired *t*-test.  $n = 5$  for GLUT1 groups and  $n = 6$  for the other groups.

**Fig. S11** 2-DG abolishes the HSPA12A-increased lactate generation and proliferation of TEC after H/R.

- A.** The brief diagram of glycolysis pathway. 2-DG was used to block lactate generation.
- B.** Lactate contents in culture medium of H/R-treated TEC were measured in the presence or absence of 2-DG. Data are mean  $\pm$  SD,  $**P < 0.01$  by one-way ANOVA followed by Brown-Forsythe and Welch test.  $n = 5$ .
- C.** Cell proliferation in H/R-treated TEC was indicated by EdU incorporation in the presence or absence of 2-DG. Data are mean  $\pm$  SD,  $**P < 0.01$  by one-way ANOVA followed by Tukey's test.  $n = 3$ . Scale bar = 50  $\mu\text{m}$ .

**Fig. S12** Effect of HSPA12A on nuclear abundance of Hif1 $\alpha$  in KI/R kidney.

- A. Experimental setting of primary TEC.**
- B.** Anti-Flag-HSPA12A immunoprecipitates prepared from H/R-treated TEC were immunoblotted with Hif1 $\alpha$ . Input or IgG-immunoprecipitates served as positive or negative controls. Note that Hif1 $\alpha$  was not recovered in Flag-tagged HSPA12A immunoprecipitates.
- C. Experimental setting of mouse kidneys.**
- D.** Following KI/R, nuclear fraction was prepared from kidneys for immunoblotting

against Hif1 $\alpha$ . Blots for LaminA/C served as loading controls. Data are mean  $\pm$  SD,

\*\* $P < 0.01$  by Student's two-tailed unpaired  $t$ -test.  $n = 5$ .

**Fig. S13** Hif1 $\alpha$  inhibition diminishes the HSPA12A-induced increase of proliferation of TEC after H/R.

Cell proliferation was examined by EdU incorporation in H/R-treated *Hspa12a*<sup>O/E</sup> TEC in the presence or absence of YC-1. Data are mean  $\pm$  SD, \*\* $P < 0.01$  by one-way ANOVA followed by Tukey's test.  $n = 3$ . Scale bar = 50  $\mu$ m.

## Supplemental Tables

**Table S1. SiRNA sequence used in the experiments**

| Species | Gene name  | Sequence (5'-3') |                       |
|---------|------------|------------------|-----------------------|
| Mus     | <i>Myc</i> | Sence            | CCGUACAGCCCUAUUUCAUTT |
|         |            | Antisence        | AUGAAAUAGGGCUGUACGGTT |

**Table S2. Antibodies used in the experiments**

| Antibody                    | Source | Company             | Catalog No. |
|-----------------------------|--------|---------------------|-------------|
| Anti-HSPA12A                | Rabbit | Abcam               | ab200838    |
| Anti- $\alpha$ -Tubulin     | Mouse  | ProteinTech         | 66031-1-Ig  |
| Anti-GAPDH                  | Rabbit | Bioworld Technology | AP0063      |
| Anti-c-Myc                  | Rabbit | ProteinTech         | 10828-1-AP  |
| Anti-L-lactyl lysine (Klac) | Rabbit | PTM BIO             | PTM-1401RM  |
| Anti-H3                     | Rabbit | ProteinTech         | 17168-1-AP  |
| Anti-Flag                   | Mouse  | Sigma-Aldrich       | F1804       |
| Anti-PKM2                   | Rabbit | ProteinTech         | 60268-1-Ig  |
| Anti-LDHA                   | Rabbit | Abcam               | ab101562    |
| Anti-GLUT1                  | Rabbit | Cell Signaling      | #12939S     |
| Anti-GLUT4                  | Rabbit | Abcam               | ab33780     |
| Anti-MCT4                   | Rabbit | ProteinTech         | 22787-1-AP  |
| Anti-Hif1 $\alpha$          | Rabbit | Abcam               | ab2185      |
| Anti-Lamin A/C              | Rabbit | ProteinTech         | 10298-1-AP  |
| Anti-IgG                    | Mouse  | SantaCruz           | sc-2025     |
| Anti-Cytokeratin 18         | Rabbit | Abcam               | ab181597    |
| Anti-Ki-67                  | Rabbit | Cell Signaling      | #9449       |

**Table S3. Primers used in the experiments**

| <b>Gene name</b>        | <b>Primers</b> |                         |
|-------------------------|----------------|-------------------------|
| <i>Cyclinb1 for mus</i> | Forward        | AGAGCTATCCTCATTGACTGGC  |
|                         | Reverse        | AACATGGCCGTTACACCGAC    |
| <i>Cyclind2 for mus</i> | Forward        | TGAATTACCTGGACCGTTTCTTG |
|                         | Reverse        | AGAGTTGTTCGGTGTAATGCAC  |
| <i>Rcc1 for mus</i>     | Forward        | ACACAGGTCCCACAACACAG    |
|                         | Reverse        | GCCTTCGACTGAAGTGTCCC    |
| <i>Cdk4 for mus</i>     | Forward        | ATGGCTGCCACTCGATATGAA   |
|                         | Reverse        | TGCTCCTCCATTAGGAACTCTC  |
| <i>Cdc25a for mus</i>   | Forward        | TCCCTGACGAGAATAAATTCCT  |
|                         | Reverse        | TCGATGAGGTGAAAGGTGTCG   |
| <i>Actin for mus</i>    | Forward        | ATGACCCAAGCCGAGAAGG     |
|                         | Reverse        | CGGCCAAGTCTTAGAGTTGTTG  |
