# Supplementary material for: HSPA12A promotes c-Myc lactylation-mediated proliferation of tubular epithelial cells to facilitate renal functional recovery from kidney ischemia/reperfusion injury
Source: PubMed Central journal article supplement — Cell Mol Life Sci. 2024 Sep 15;81(1):404. doi: 10.1007/s00018-024-05427-5 (PMC11402889; doi:10.1007/s00018-024-05427-5), 2024-09-15
Supplement: 18_2024_5427_MOESM3_ESM.pdf [file 18_2024_5427_MOESM3_ESM.pdf]

## Supplemental Tables

**Table S1. SiRNA sequence used in the experiments**

| Species | Gene name  | Sequence (5'-3') |                       |
|---------|------------|------------------|-----------------------|
| Mus     | <i>Myc</i> | Sence            | CCGUACAGCCCUAUUUCAUTT |
|         |            | Antisence        | AUGAAAUAGGGCUGUACGGTT |

**Table S2. Antibodies used in the experiments**

| Antibody                    | Source | Company             | Catalog No. |
|-----------------------------|--------|---------------------|-------------|
| Anti-HSPA12A                | Rabbit | Abcam               | ab200838    |
| Anti- $\alpha$ -Tubulin     | Mouse  | ProteinTech         | 66031-1-Ig  |
| Anti-GAPDH                  | Rabbit | Bioworld Technology | AP0063      |
| Anti-c-Myc                  | Rabbit | ProteinTech         | 10828-1-AP  |
| Anti-L-lactyl lysine (Klac) | Rabbit | PTM BIO             | PTM-1401RM  |
| Anti-H3                     | Rabbit | ProteinTech         | 17168-1-AP  |
| Anti-Flag                   | Mouse  | Sigma-Aldrich       | F1804       |
| Anti-PKM2                   | Rabbit | ProteinTech         | 60268-1-Ig  |
| Anti-LDHA                   | Rabbit | Abcam               | ab101562    |
| Anti-GLUT1                  | Rabbit | Cell Signaling      | #12939S     |
| Anti-GLUT4                  | Rabbit | Abcam               | ab33780     |
| Anti-MCT4                   | Rabbit | ProteinTech         | 22787-1-AP  |
| Anti-Hif1 $\alpha$          | Rabbit | Abcam               | ab2185      |
| Anti-Lamin A/C              | Rabbit | ProteinTech         | 10298-1-AP  |
| Anti-IgG                    | Mouse  | SantaCruz           | sc-2025     |
| Anti-Cytokeratin 18         | Rabbit | Abcam               | ab181597    |
| Anti-Ki-67                  | Rabbit | Cell Signaling      | #9449       |

**Table S3. Primers used in the experiments**

| <b>Gene name</b>        | <b>Primers</b> |                         |
|-------------------------|----------------|-------------------------|
| <i>Cyclinb1 for mus</i> | Forward        | AGAGCTATCCTCATTGACTGGC  |
|                         | Reverse        | AACATGGCCGTTACACCGAC    |
| <i>Cyclind2 for mus</i> | Forward        | TGAATTACCTGGACCGTTTCTTG |
|                         | Reverse        | AGAGTTGTTCGGTGTAATGCAC  |
| <i>Rcc1 for mus</i>     | Forward        | ACACAGGTCCCACAACACAG    |
|                         | Reverse        | GCCTTCGACTGAAGTGTCCC    |
| <i>Cdk4 for mus</i>     | Forward        | ATGGCTGCCACTCGATATGAA   |
|                         | Reverse        | TGCTCCTCCATTAGGAACTCTC  |
| <i>Cdc25a for mus</i>   | Forward        | TCCCTGACGAGAATAAATTCCT  |
|                         | Reverse        | TCGATGAGGTGAAAGGTGTCG   |
| <i>Actin for mus</i>    | Forward        | ATGACCCAAGCCGAGAAGG     |
|                         | Reverse        | CGGCCAAGTCTTAGAGTTGTTG  |
