# Supplementary figures and images for: HSPA12A promotes c-Myc lactylation-mediated proliferation of tubular epithelial cells to facilitate renal functional recovery from kidney ischemia/reperfusion injury
Source: PubMed Central journal article supplement — Cell Mol Life Sci. 2024 Sep 15;81(1):404. doi: 10.1007/s00018-024-05427-5 (PMC11402889; doi:10.1007/s00018-024-05427-5), 2024-09-15

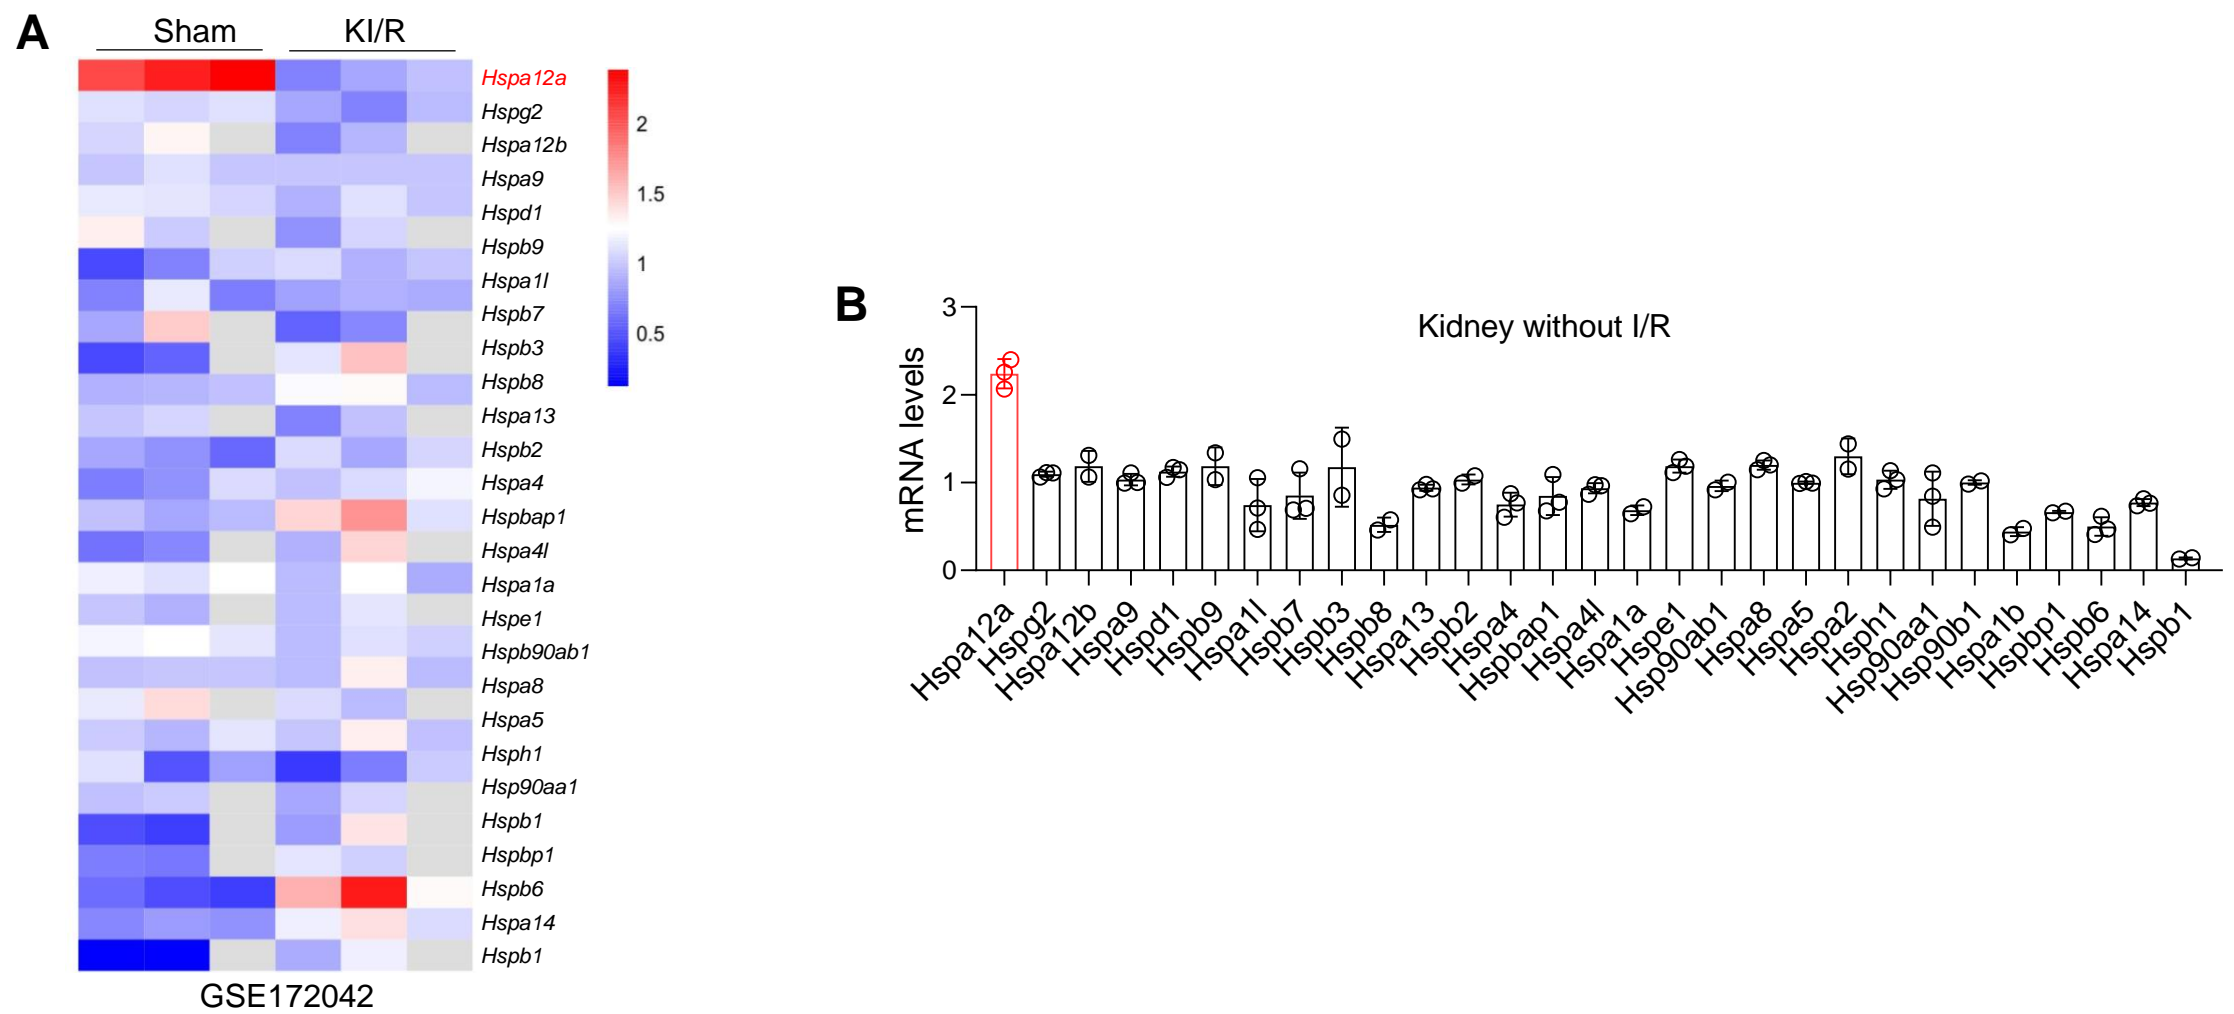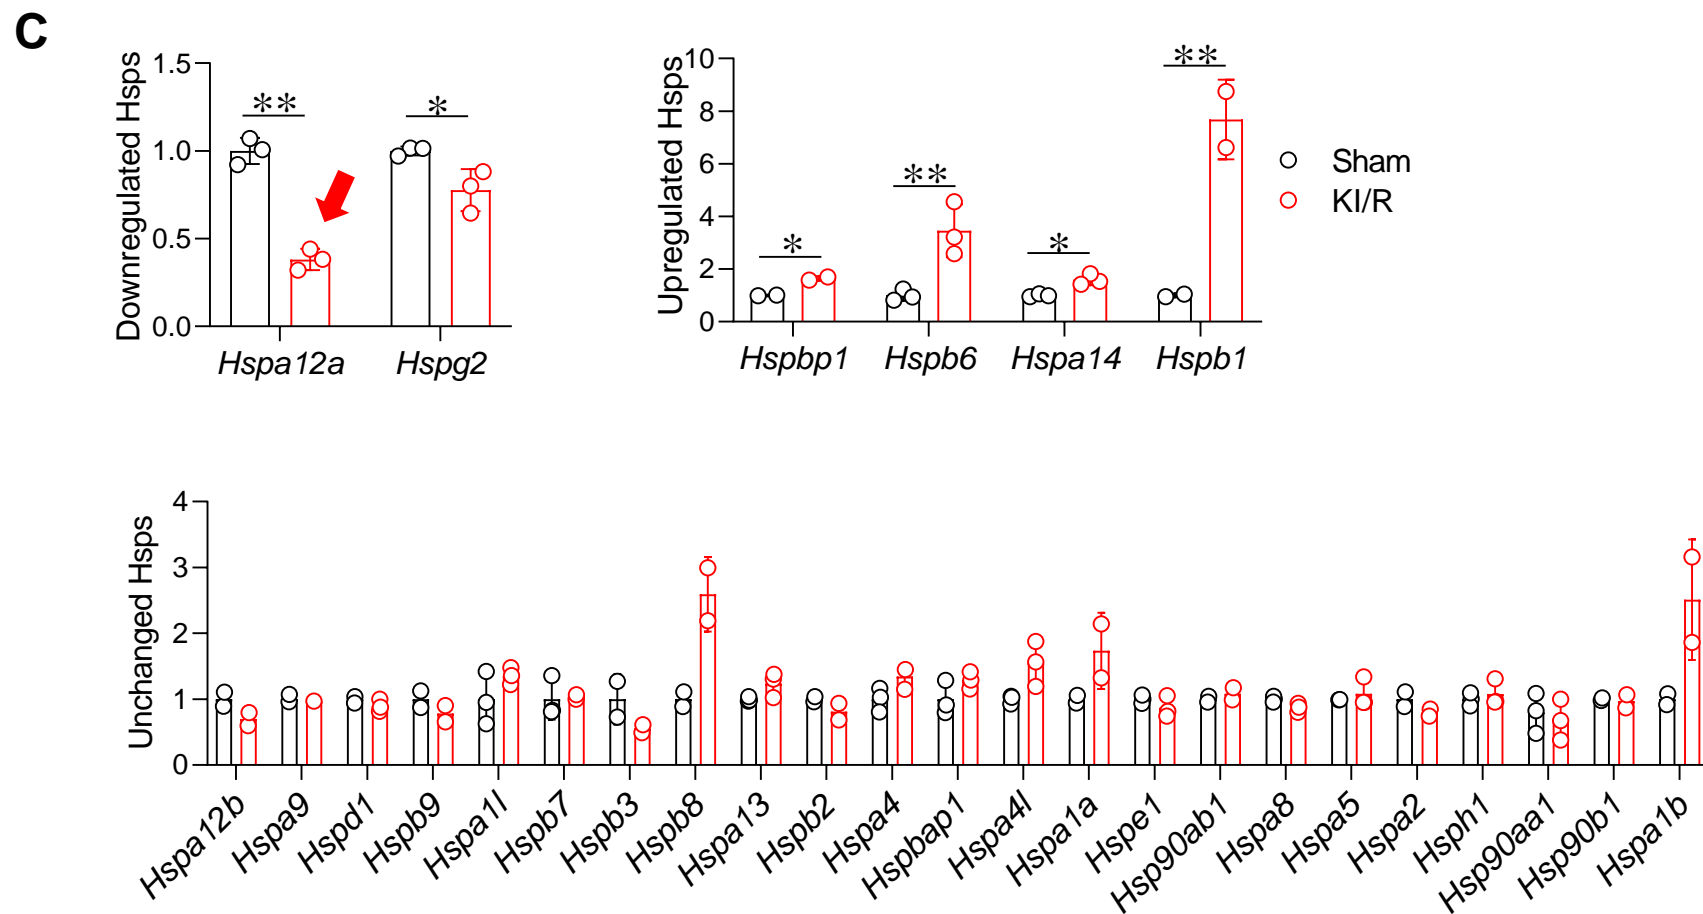

**Fig. S1**

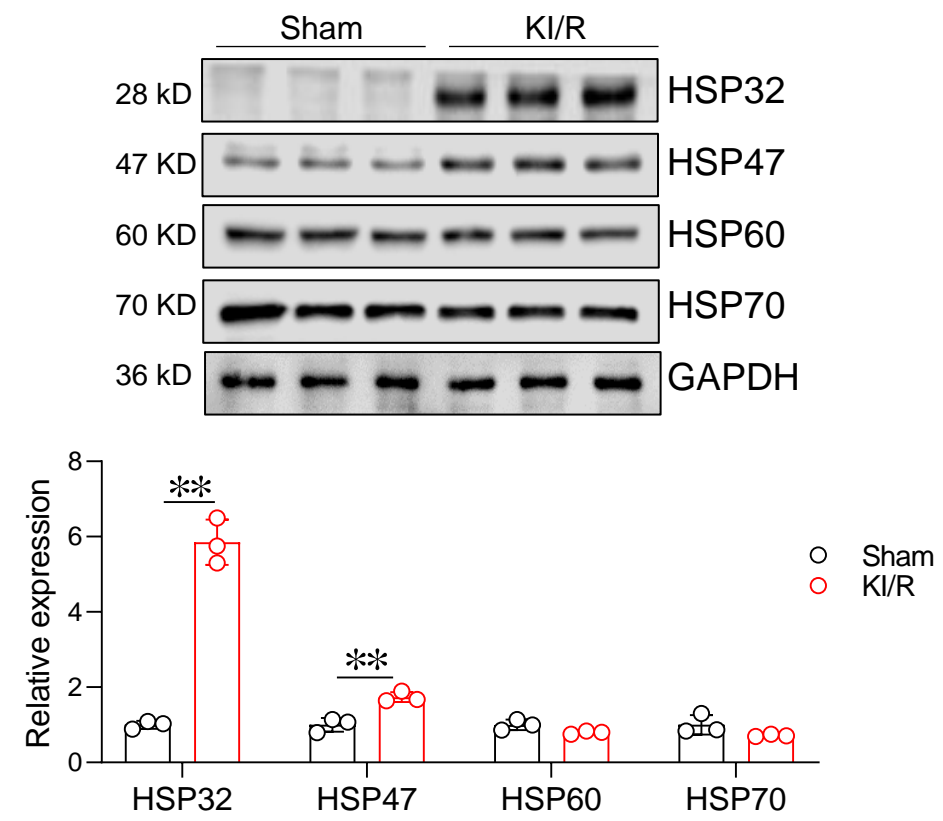

**Fig. S2**

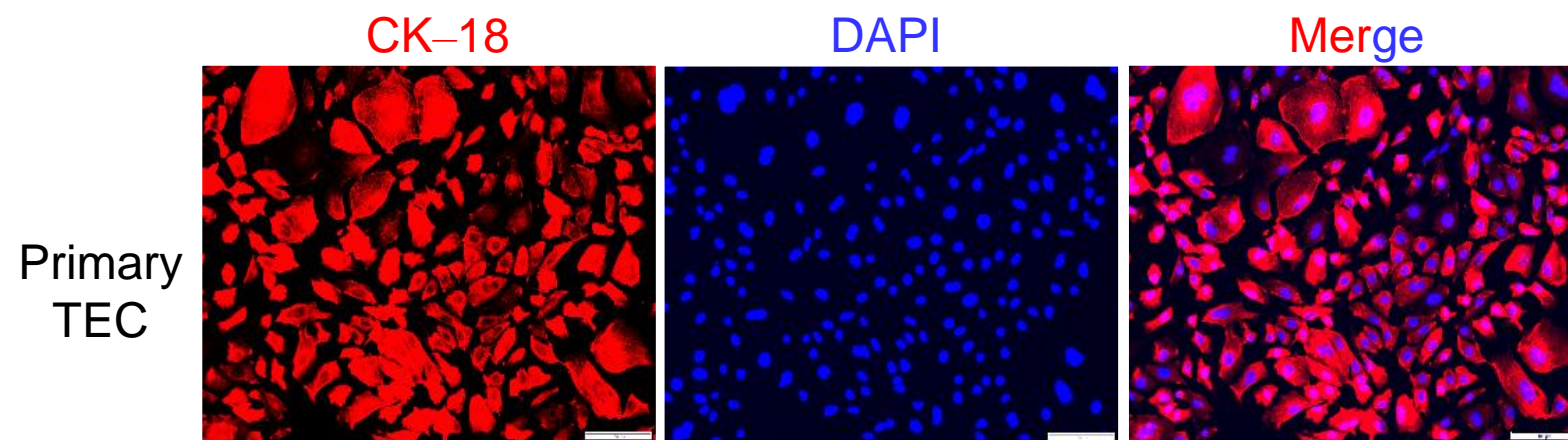

**Fig. S3**

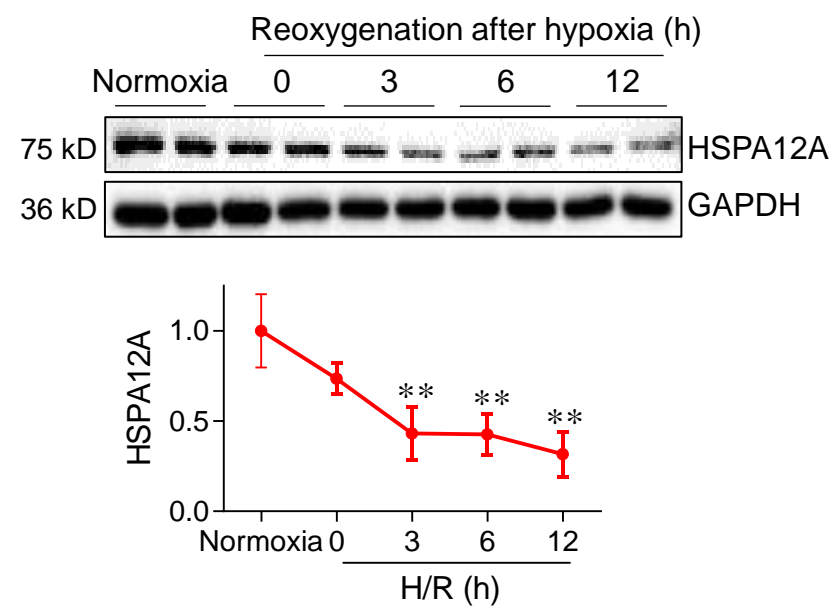

**Fig. S4**

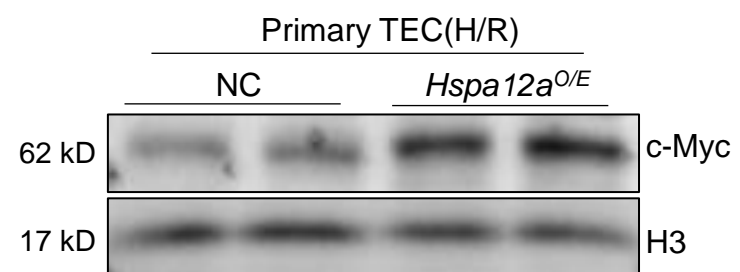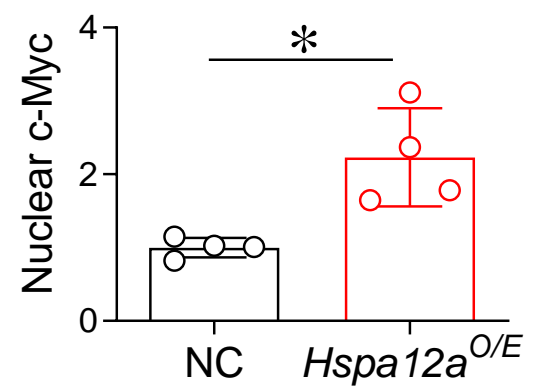

**Fig. S5**

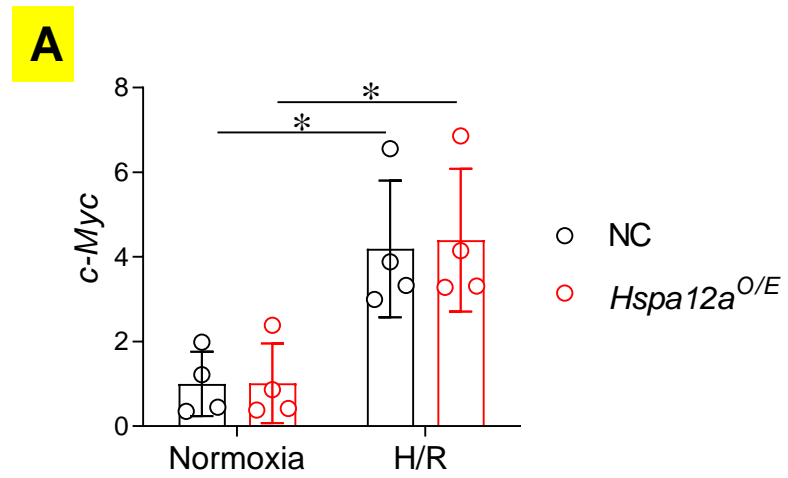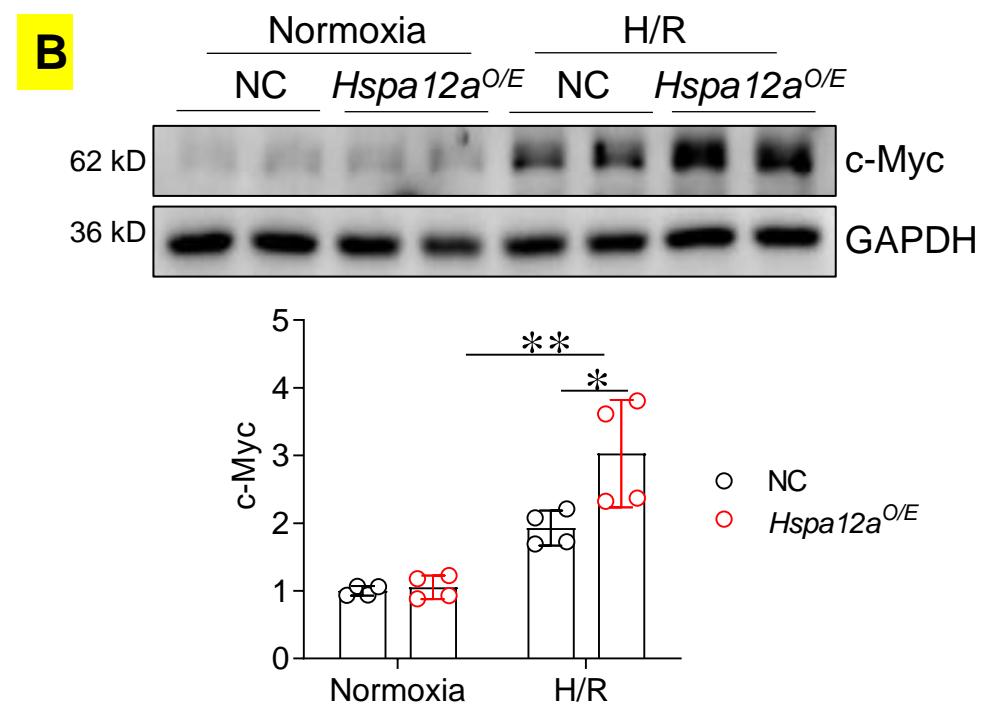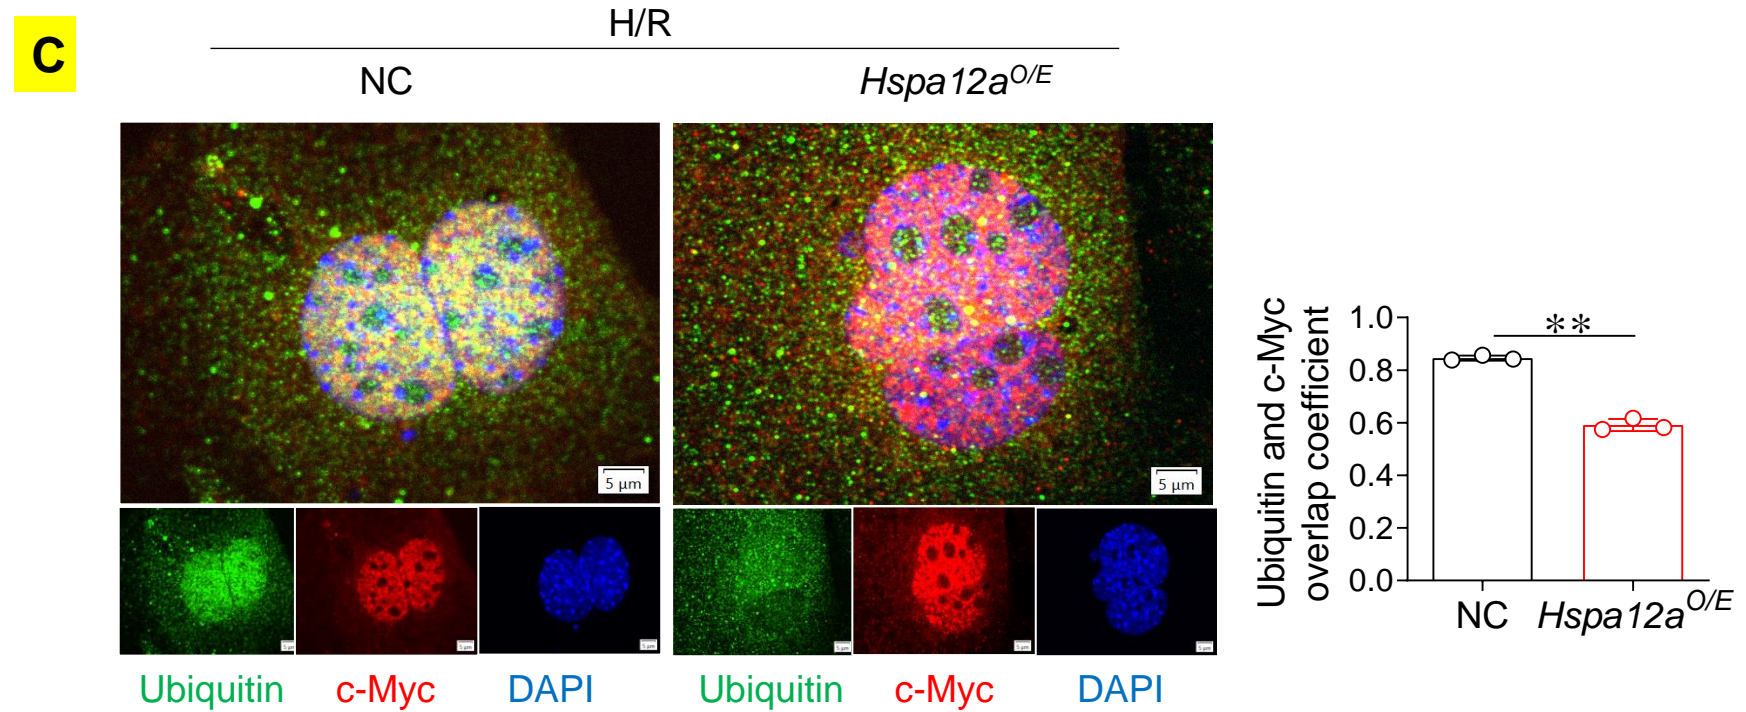

**Fig. S6**

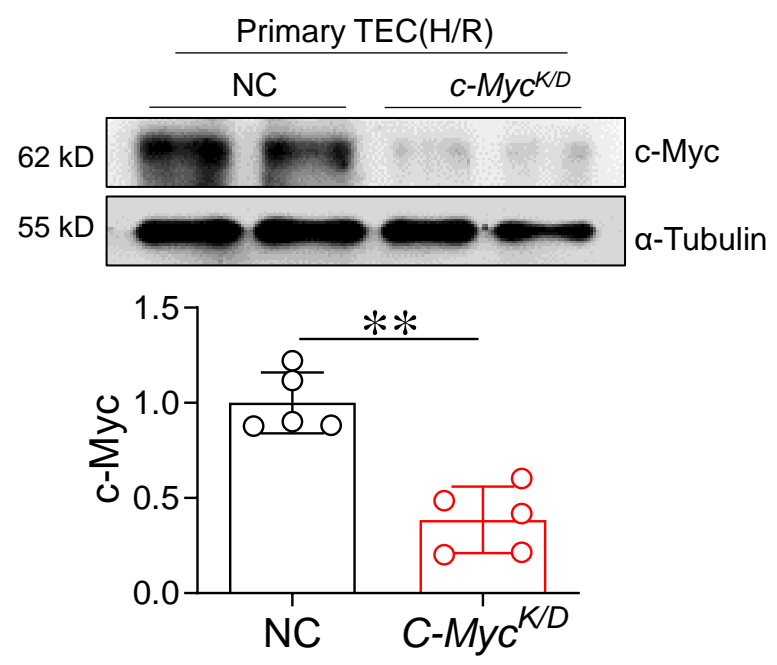

**Fig. S7**

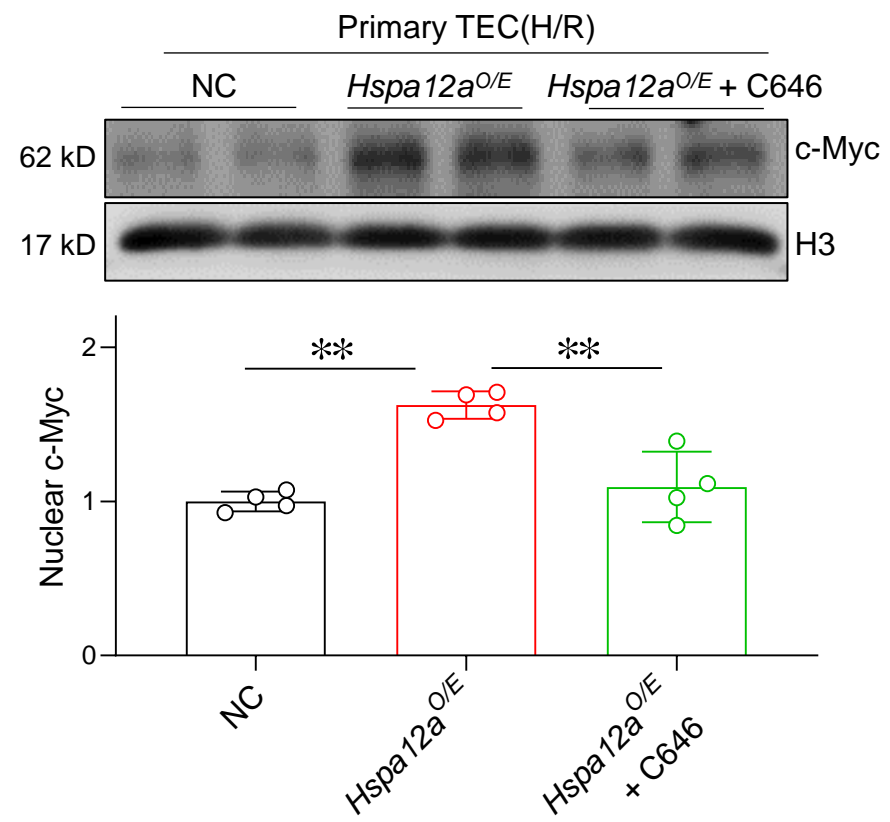

**Fig. S8**



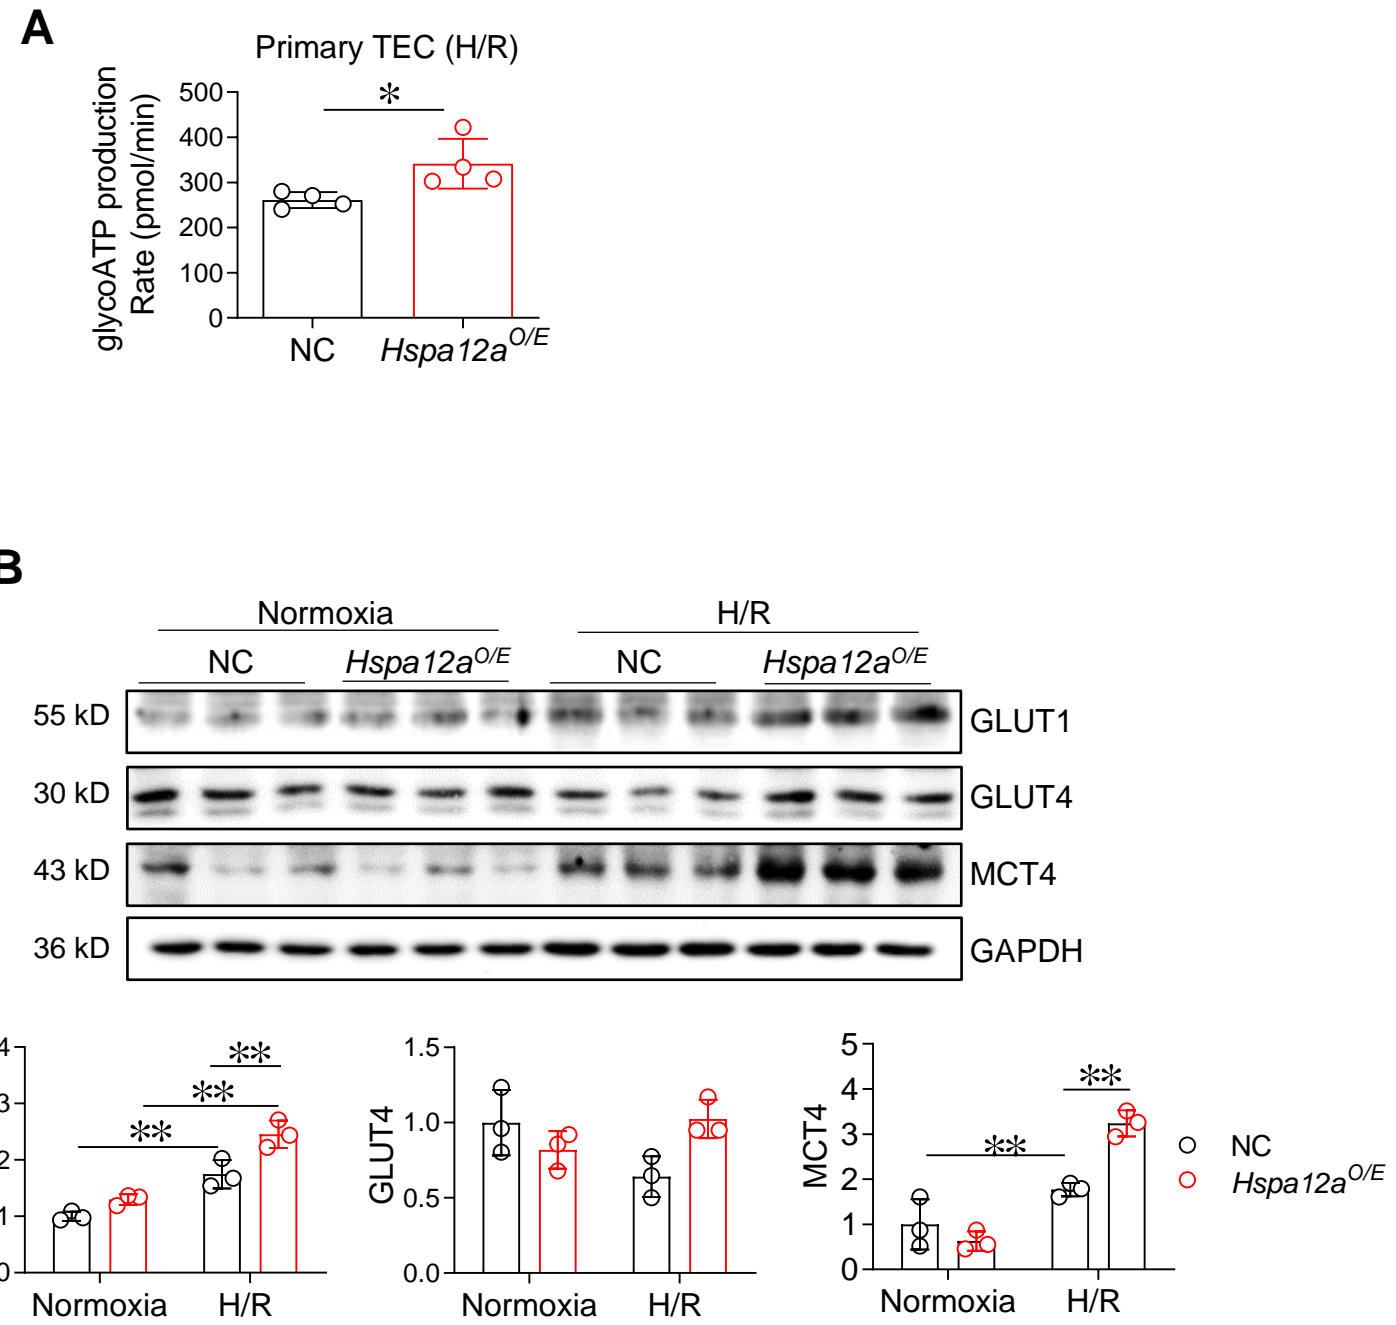

**Fig. S9**

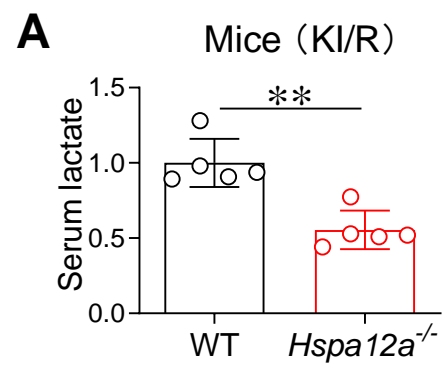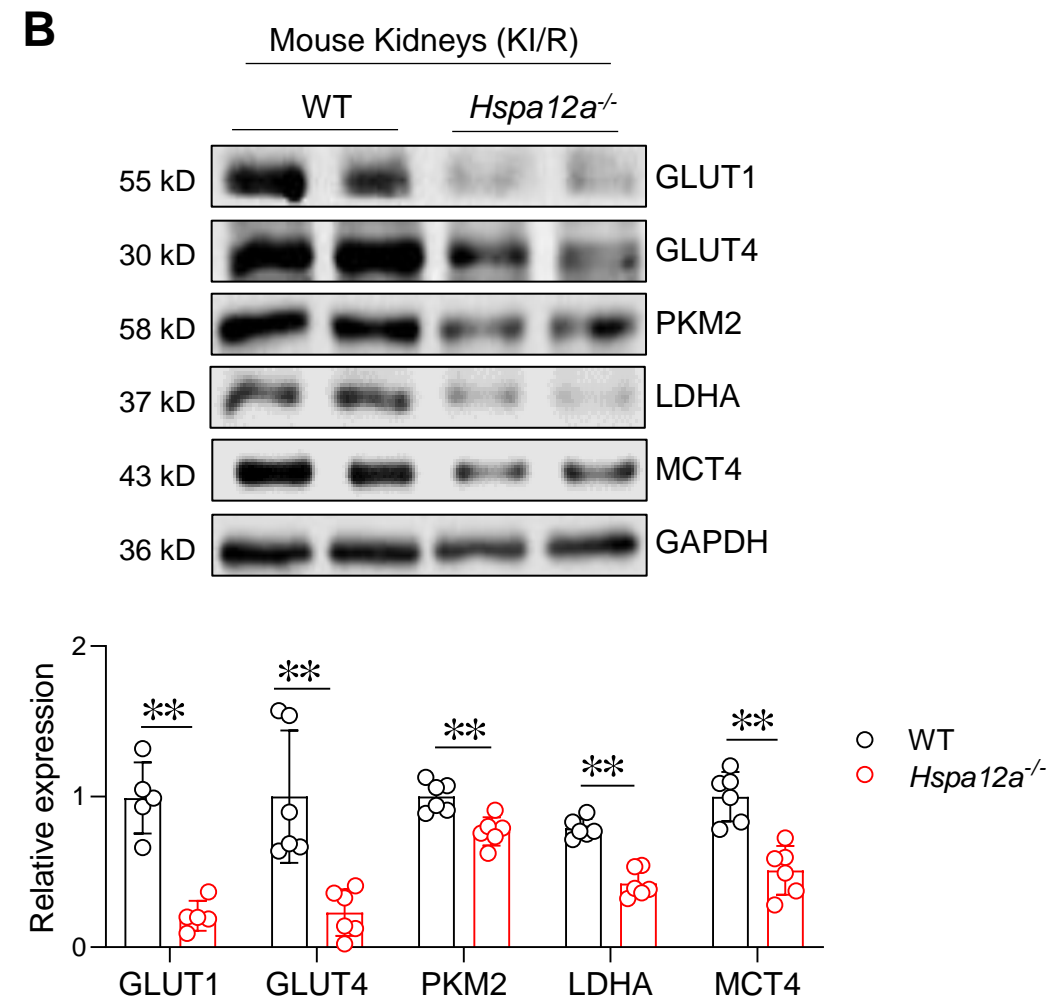

**Fig. S10**

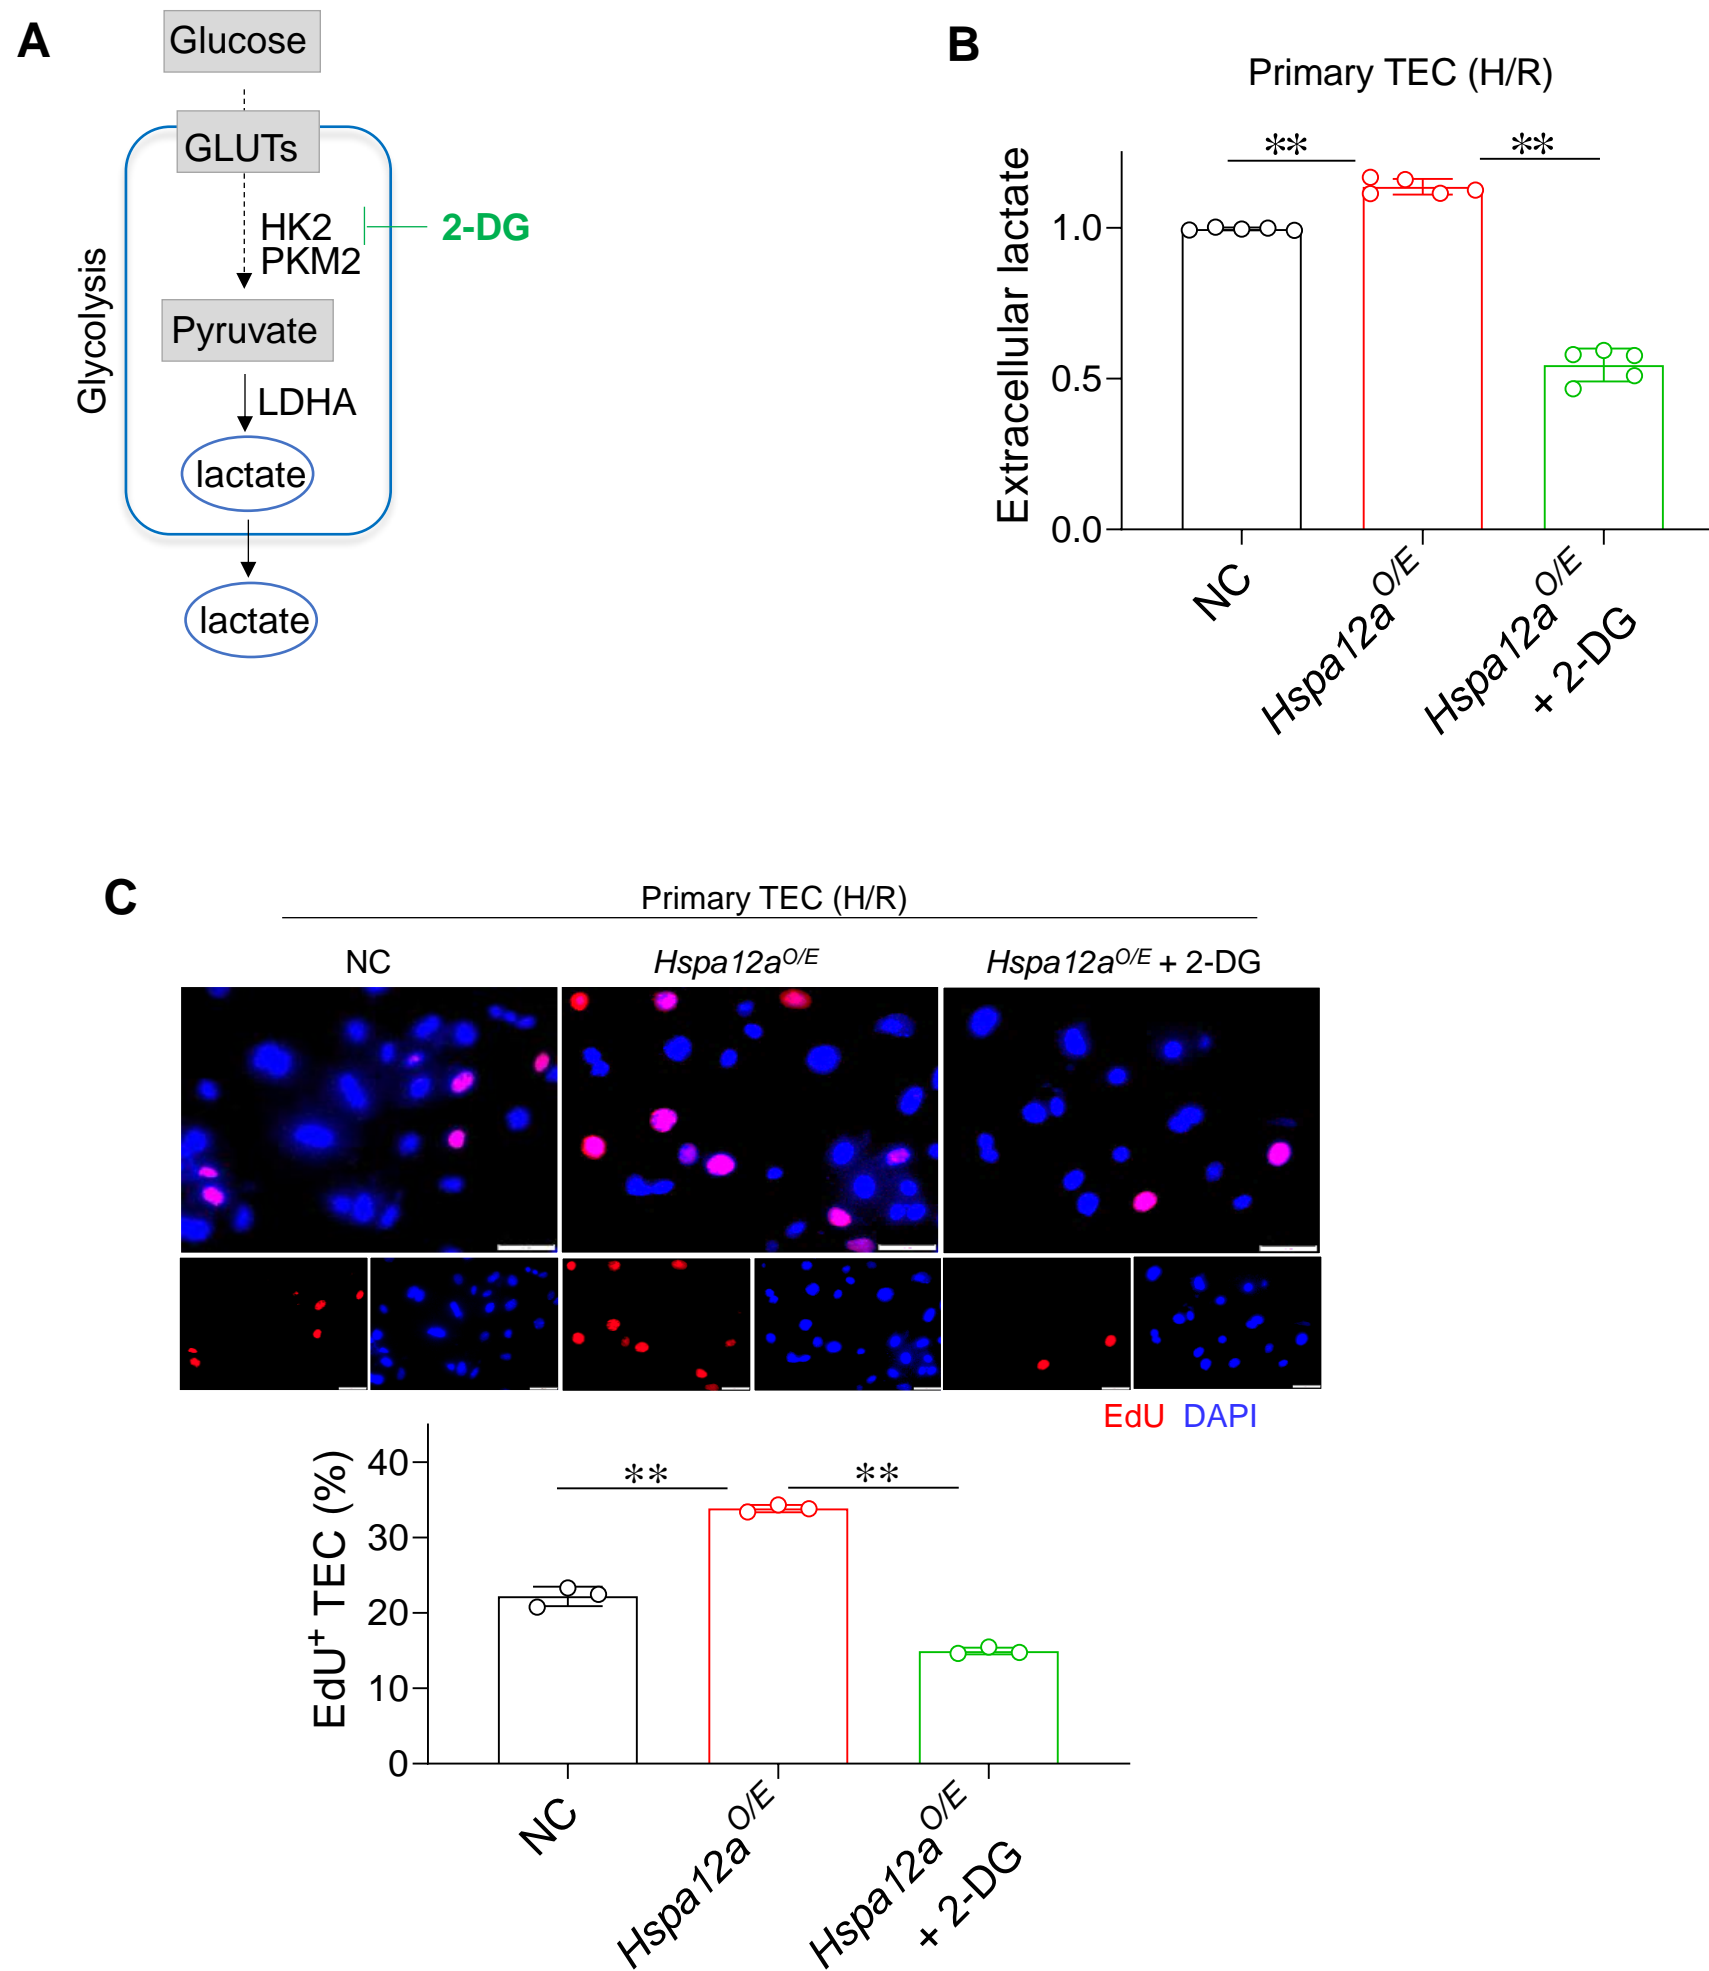

**Fig. S11**

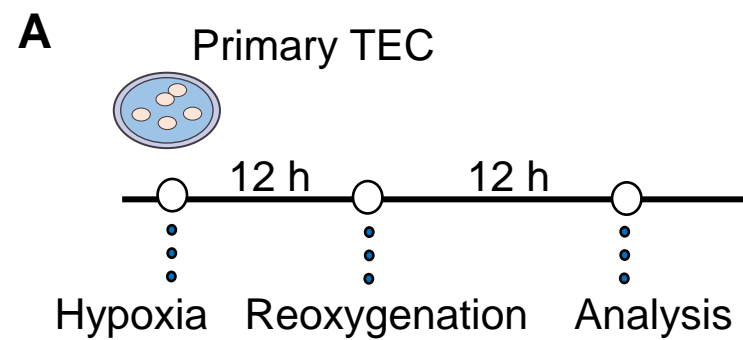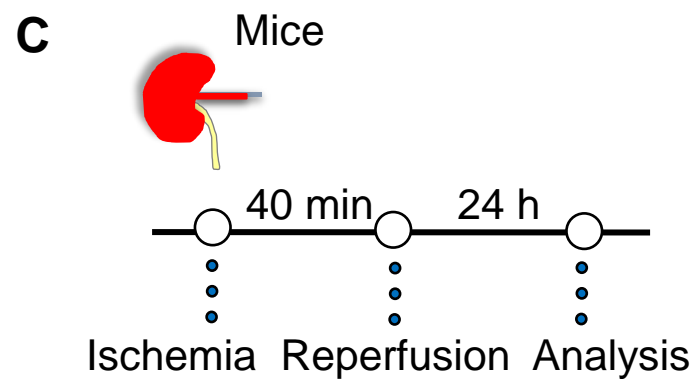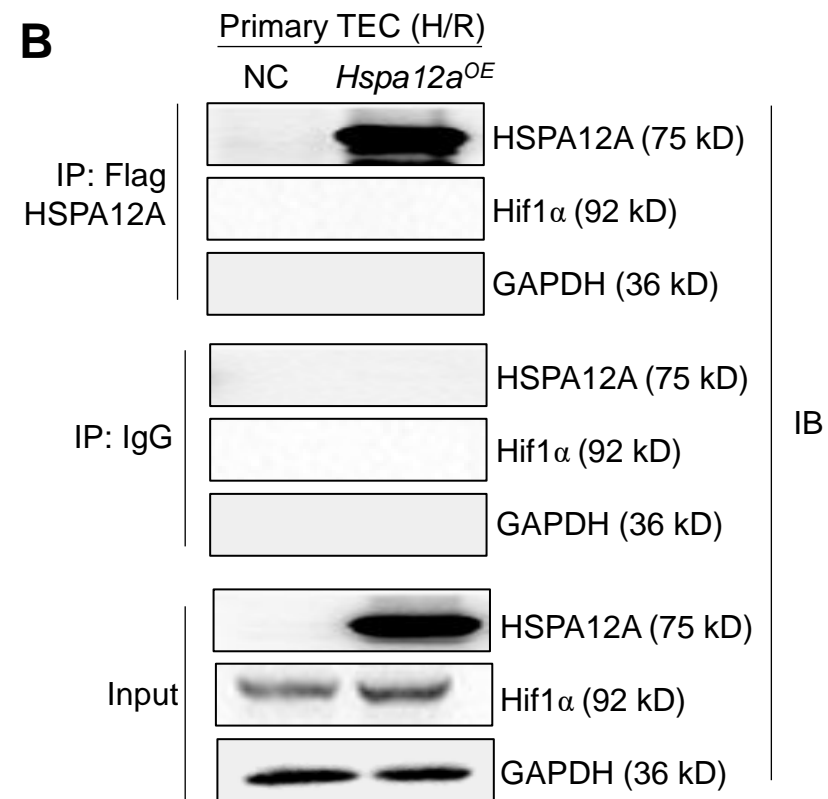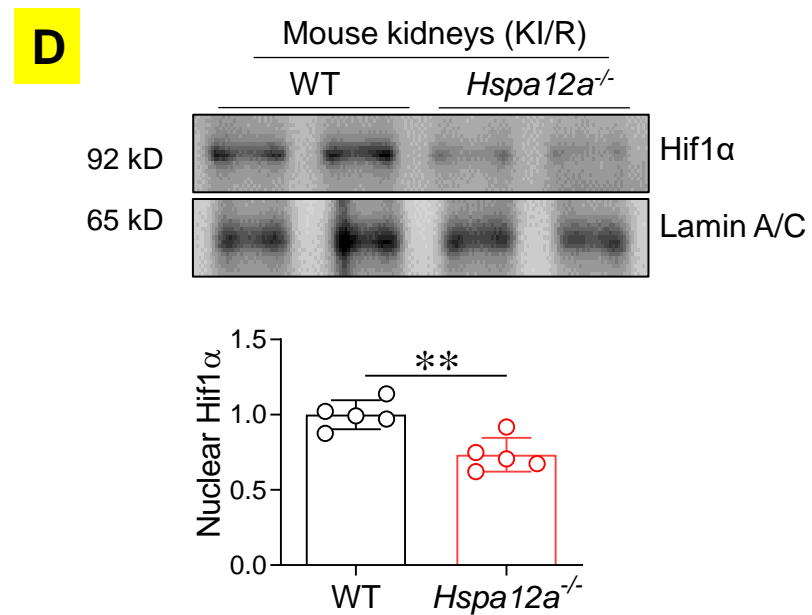

**Fig. S12**

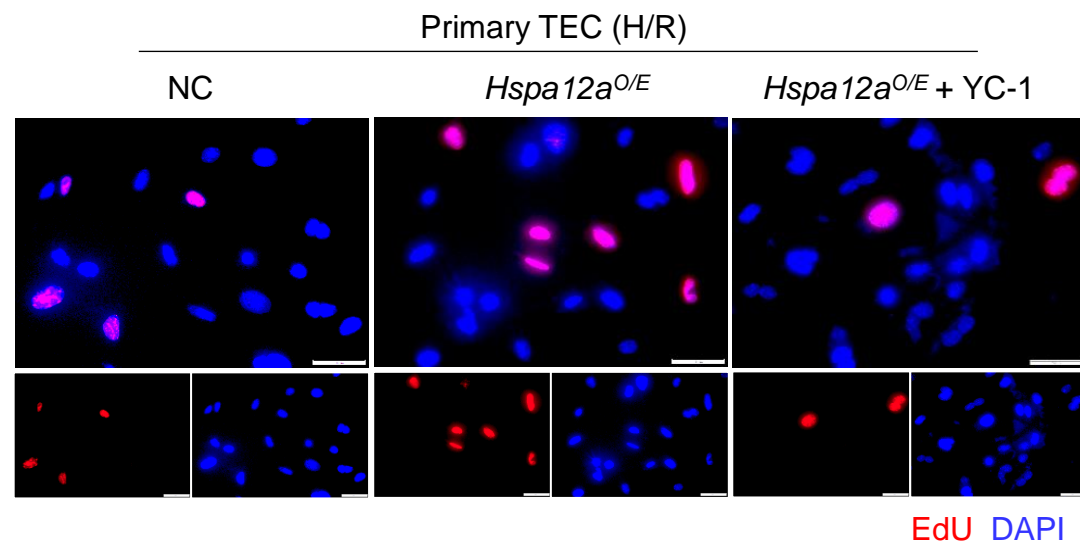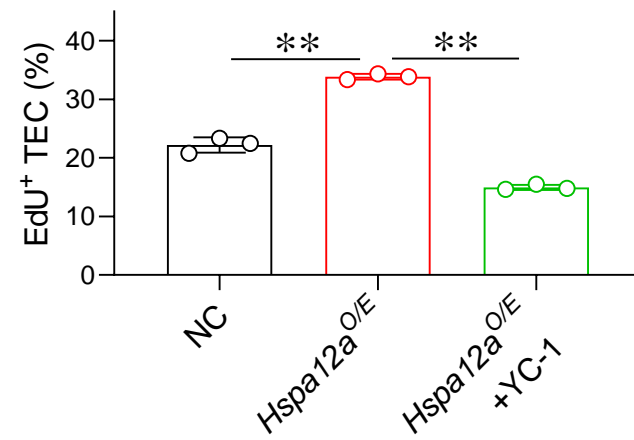

**Fig. S13**

Supplement: 18_2024_5427_MOESM2_ESM.pdf [file 18_2024_5427_MOESM2_ESM.pdf]
